# Supplementary material for: An endothelial SOX18–mevalonate pathway axis enables repurposing of statins for infantile hemangioma
Source: JCI journal article supplement (doi:10.1172/jci179782), 2025-02-25
Supplement: sd1 [file 1]

# **An endothelial SOX18-mevalonate pathway axis enables repurposing of statins for infantile hemangioma**

Annegret Holm<sup>1</sup>, Matthew S. Graus<sup>2</sup>, Jill Wylie-Sears<sup>1</sup>, Jerry Wei Heng Tan<sup>1</sup>, Maya Alvarez-Harmon<sup>1</sup>, Luke Borgelt<sup>1</sup>, Sana Nasim<sup>1</sup>, Long Chung<sup>2</sup>, Ashish Jain<sup>3</sup>, Mingwei Sun<sup>3</sup>, Liang Sun<sup>3</sup>, Pascal Brouillard<sup>4</sup>, Ramrada Lekwuttikarn<sup>5</sup>, Yanfei Qi<sup>2</sup>, Joyce Teng<sup>5</sup>, Miikka Vikkula<sup>4,6</sup>, Harry Kozakewich<sup>7</sup>, John B. Mulliken<sup>8</sup>, Mathias Francois<sup>2,9</sup>, and Joyce Bischoff<sup>1\*</sup>

**Supplemental Figures and Tables**

### S1.1 Experimental design for bulk RNA Seq of IH patient-derived HemSC

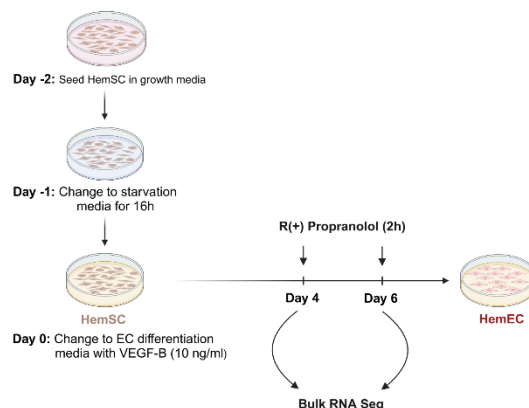

### S1.2 Validation of HemSC endothelial differentiation

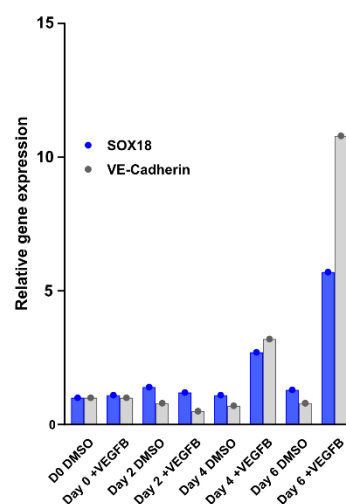

## Supplemental Figure 1.

**S1.1** Experimental steps to induce HemSC to undergo endothelial differentiation (n=6 biological replicates). VEGF-B at 10ng/ml was added to serum starved HemSC on Day 0. RNA isolated from cells treated  $\pm$  R(+) propranolol (20  $\mu$ M) for 2 hours on Day 4 and Day 6.

**S1.2** HemSC to endothelial differentiation over 6 days was assessed by qPCR for SOX18 and VE-Cadherin (n=1).

## Supplemental Figure 2. Overview of MVP genes regulated by R(+) Propranolol (Figure 1A-C)

| Gene           | Day 4               |                  | Day 6               |                  |
|----------------|---------------------|------------------|---------------------|------------------|
|                | Log <sub>2</sub> Fc | Adjusted p value | Log <sub>2</sub> Fc | Adjusted p value |
| <i>HMGCS1</i>  | 0.462979006         | 0.026354098      | -1.63371667         | 0.000484519      |
| <i>HMGCR</i>   | 0.169344377         | 0.044323597      | -1.374323007        | 0.000424613      |
| <i>MVK</i>     | 0.314895512         | 0.029933298      | -1.147210743        | 0.000127633      |
| <i>MVD</i>     | 0.441665738         | 1.75E-06         | -1.288125115        | 0.002855957      |
| <i>FDPS</i>    | 0.217777666         | 0.019564343      | -1.033766375        | 0.006204092      |
| <i>IDI1</i>    | 0.24599104          | 0.010011861      | -1.226584676        | 0.004495371      |
| <i>FDFT1</i>   | 0.173687183         | 0.080502823      | -0.874992512        | 0.011617406      |
| <i>SQLE</i>    | 0.186643474         | 0.080502823      | -1.274290854        | 0.001552676      |
| <i>LSS</i>     | 0.161258298         | 0.088436956      | -0.74862184         | 0.017189697      |
| <i>SC5D</i>    | 0.079030565         | 0.728721351      | -0.96705494         | 0.005332315      |
| <i>HSD17B7</i> | 0.211229037         | 0.550897945      | -1.81198247         | 2.01E-06         |
| <i>NSDHL</i>   | 0.192680874         | 0.220906602      | -0.686486501        | 0.015844376      |
| <i>DHCR7</i>   | 0.231028296         | 0.09552771       | -1.404321837        | 0.002936361      |
| <i>DHCR24</i>  | 0.039092468         | 0.885153473      | -1.599436532        | 0.014079728      |
| <i>ABCA1</i>   | -0.068070967        | 0.859222104      | 2.207383944         | 6.43E-05         |

**Supplemental Figure 2.** Log2 fold changes and adjusted p values of differentially regulated MVP genes and ABCA1 upon R(+) propranolol treatment on Day 4 and Day 6 shown in Figure 1B.

### S3.1 FACS as a readout for decreased HMGC1 and HMGC2 protein levels in SOX18<sup>RaOp</sup>- expressing HUVEC

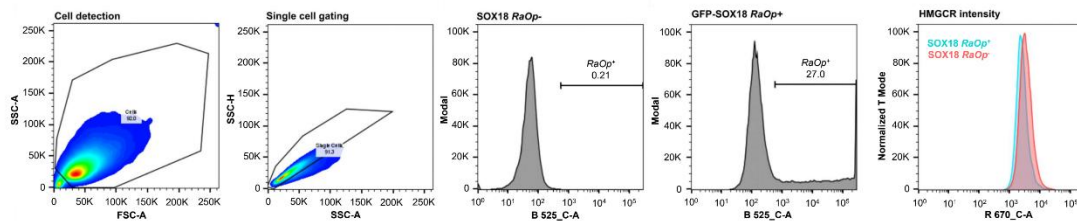

### S3.2 Validation of the anti-SREBP2 antibody for detection of precursor (122 kDa) and mature (62 kDa) forms of SREBP2

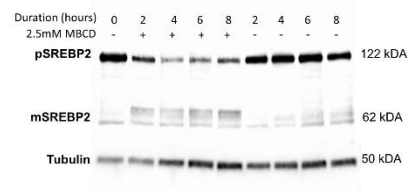

### Gain and loss of function of SOX18 demonstrates a SOX18/SREBP2-dependent mechanism to regulate the MVP on protein level

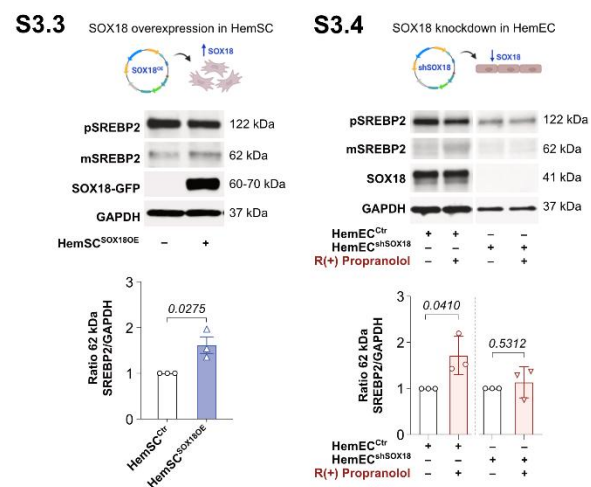

## Supplemental Figure 3.

**S3.1** Flow cytometry plots of HUVECs expressing fluorescently tagged SOX18<sup>RaOp</sup> stained for HMGC1 and HMGC2 and respective control for analysis in Figure 3C,D. Gating is shown in the two left panels; representative GFP expression in RaOp<sup>+</sup> and flow cytometry plot depicting decreased HMGC2 intensity in RaOp<sup>+</sup> compared to its control in the two right panels.

**S3.2** The human anti-SREBP2 antibody was validated in HemSC ± cholesterol depletion with MBCD for time points ranging from 0-8 hours. MBCD treatment corresponds with a transient decrease in 122 kDa precursor SREBP2 and corresponding increase in 62kDa mature SREBP2.

**S3.3** WB analysis of HemSC with lentiviral overexpression of SOX18 (HemSC<sup>SOX18OE</sup>), grown in full media (10% FBS), showed significantly increased mature SREBP2 (n=3 independent experiments). SOX18 overexpression verified by WB.

**S3.4** WB analysis of control HemEC (HemEC<sup>Ctrl</sup>) versus HemEC with SOX18 knockdown (HemEC<sup>shSOX18</sup>) grown in full media (10% FBS) treated ± R(+) propranolol for 24 hours (n=3 biological replicates). SOX18 knockdown verified by WB.

#### S4.1 Ki67 expression in infantile and congenital hemangiomas

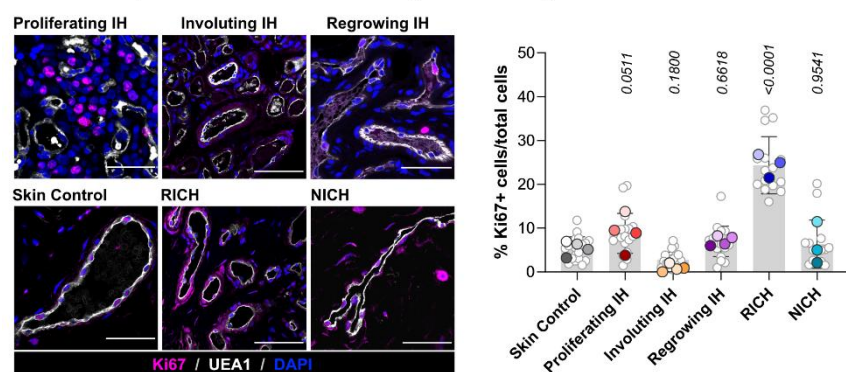

#### S4.2 Single channels of main Figure 4A-F

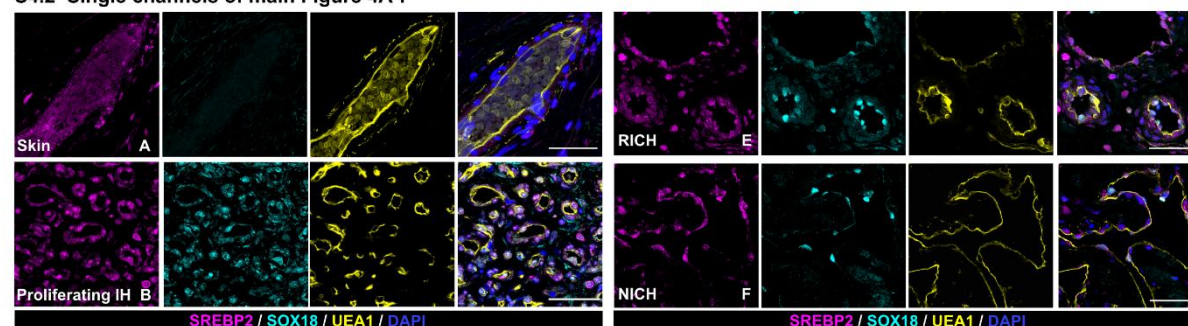

#### S4.3; S4.4 Antibody validations

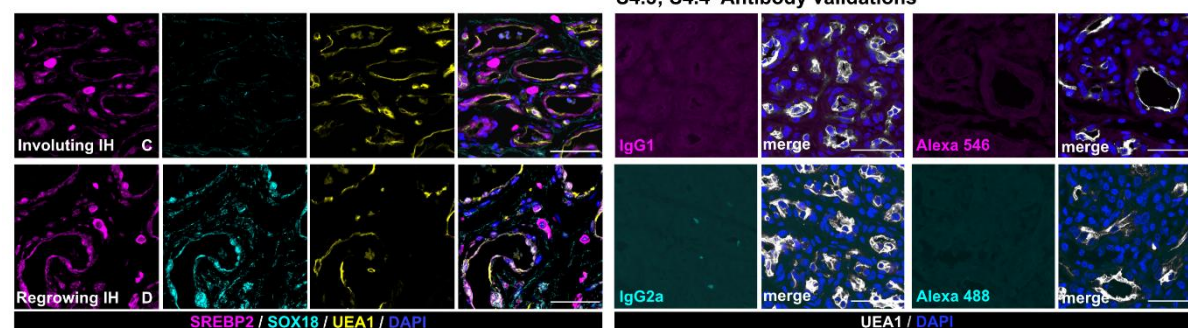

### Supplemental Figure 4:

**S4.1** Proliferation was assessed by staining with anti-Ki67 (magenta) in IH, RICH and NICH with skin as a control; vessels were stained with human EC-specific lectin UEA1 (grey), cell nuclei were stained with DAPI (blue). Quantification of Ki67 positive cells/total cells with ImageJ shows Ki67 significantly increased in RICH compared to normal skin (n=4 biological replicates for proliferating, involuting, regrowing IH, and skin control; n= 3 for RICH and n=3 NICH; each colored data point shows the average of 5 representative images each represented as a gray datapoint. P values were calculated using one-way ANOVA with Šidák-correction. Data show the mean  $\pm$  SD; scale bars 50  $\mu$ m.

**S4.2** Single fluorescent channels of merged images in main Figure 4A-F for each antibody including SREBP2 (magenta), SOX18 (cyan), and the human specific lectin UEA1 (yellow) representing skin control, proliferating IH, involuting IH, regrowing IH, RICH, and NICH.

Validation of isotype-matched (**S4.3**) and secondary antibodies (**S4.4**) used in the study (proliferating IH tissue); scale bars 50  $\mu$ m.

### S5.1 Statins do not affect viability of HemSC

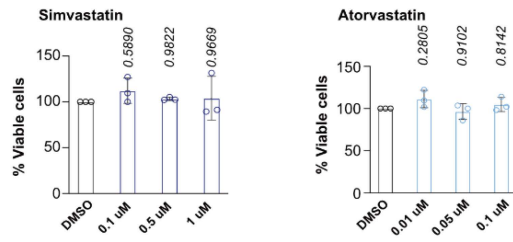

### S5.2 Statins do not increase *KLF2* and *KLF4* in HemSC undergoing endothelial differentiation

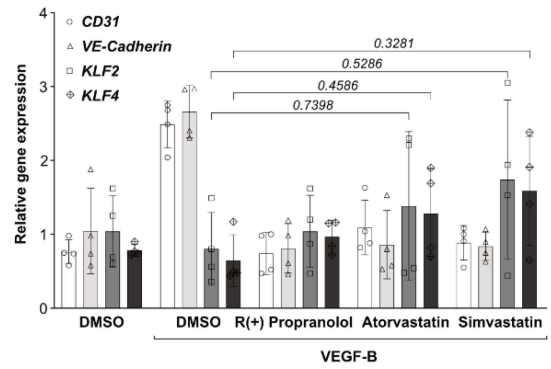

### S5.3 Atorvastatin inhibits HemSC vessel formation in vivo

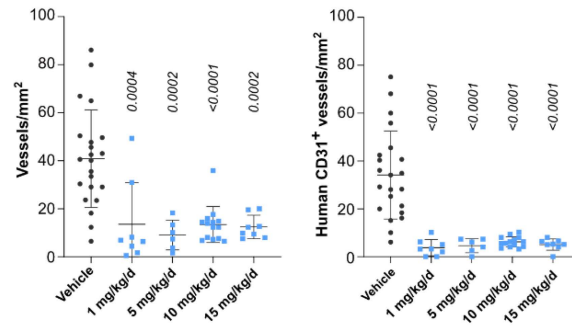

### S5.4 Statins do not affect murine angiogenesis

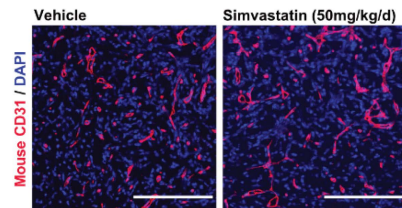

### S5.5

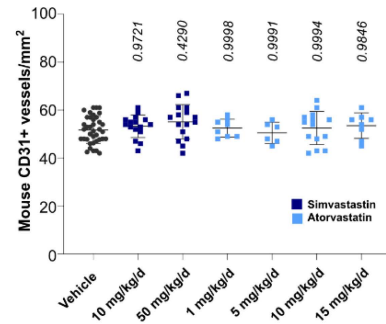

### S5.6 Statins do not affect proliferation of HemEC and HemSC

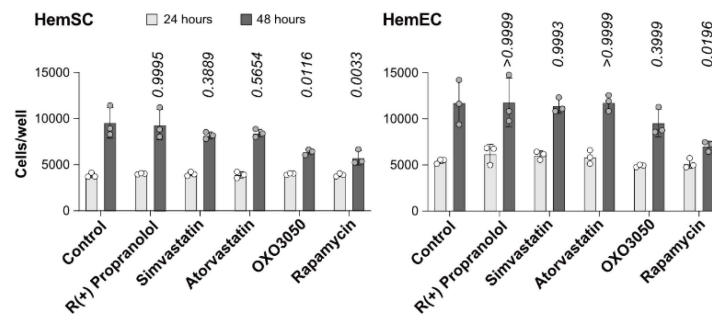

### S5.7 Human and mouse CD31 antibody specificity

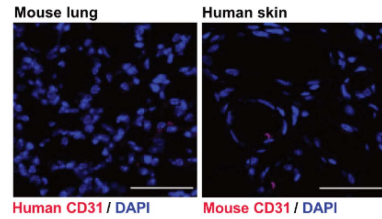



**S5.8 Immunoseparation of CD31+/CD31- cells**

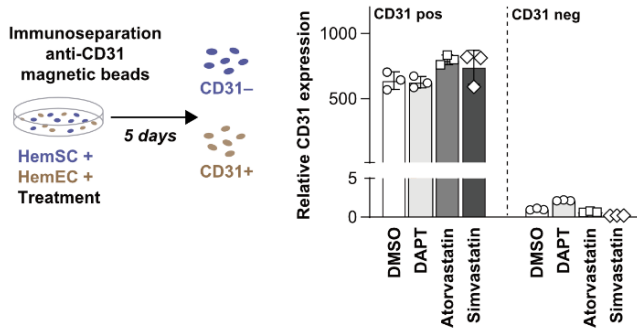

**S5.9 Microvascular mural cell marker expression is not affected by statins**

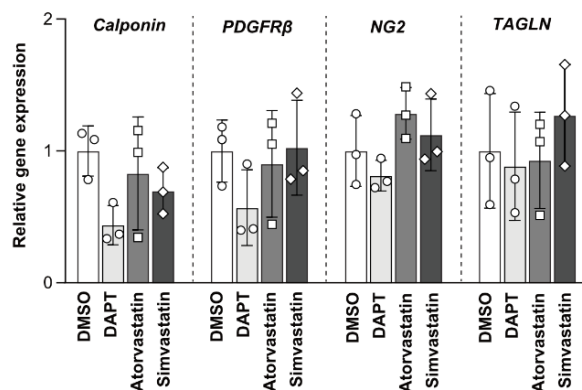

**Table S5.12: Conversion of mouse to human statin doses**

|                                 |       |       |       |       |       |       |
|---------------------------------|-------|-------|-------|-------|-------|-------|
| <b>Simvastatin</b>              |       |       |       |       |       |       |
| Used in mice (mg/kg/d)          | 50    | 10    | 5     | 1*    | 0.5   | 0.1   |
| Human equivalent dose (mg/kg/d) | 4.065 | 0.813 | 0.407 | 0.081 | 0.041 | 0.008 |
| <b>Atorvastatin</b>             |       |       |       |       |       |       |
| Used in mice (mg/kg/d)          | 15    | 10    | 5     | 1*    |       |       |
| Human equivalent dose (mg/kg/d) | 1.220 | 0.813 | 0.407 | 0.081 |       |       |

**S5.10 Statins do not affect adipogenic differentiation of HemSC**

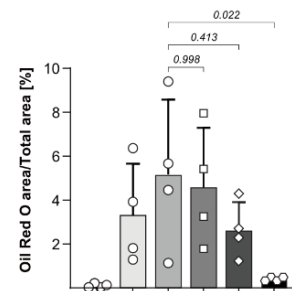

**S5.11**

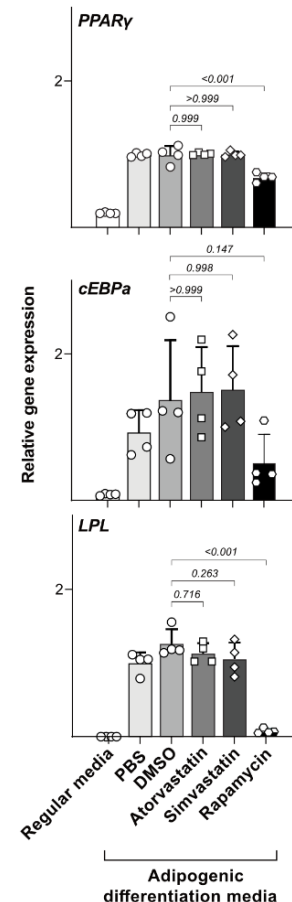

**Supplemental Figure 5.**

**S5.1** Simvastatin (0.1 - 1  $\mu$ M) or atorvastatin (0.01 - 0.1  $\mu$ M) had no effect on cell viability in HemSC treated for 48 hours).

**S5.2** KLF2 and 4 mRNA levels measured by qPCR in HemSC undergoing endothelial differentiation in the presence of R(+) propranolol, atorvastatin, or simvastatin were unchanged on Day 6 compared to DMSO.

**S5.3** HemSC (n=4) were pretreated with 0.1  $\mu$ M atorvastatin or vehicle (DMSO) for 24 hours, suspended in Matrigel with 0.05  $\mu$ M atorvastatin or an equivalent DMSO concentration and injected subcutaneously into nude mice with 2 implants/mouse. Mice were treated with 1, 5, 10 or 15 mg/kg/d atorvastatin or an equivalent volume of PBS with a DMSO every 12 hours for 7 days. Treatment with atorvastatin resulted in a significant reduction in vessel formation at each dose. Vessel density is expressed in vessels/mm<sup>2</sup>.

**S5.4 and S5.5** Matrigel implant sections from vehicle and statin treated mice were stained with anti-mouse CD31 and DAPI. The density of murine CD31+ blood vessels in the Matrigel implants was unaffected by either simvastatin or atorvastatin compared to vehicle (quantified in **S5.5**).

**S5.6** Proliferation of HemSC and HemEC measured at 24 and 48 hours was not significantly reduced upon treatment with R(+) propranolol (10  $\mu$ M), simvastatin (0.5  $\mu$ M), or atorvastatin (0.1  $\mu$ M). The squalene synthase 1 inhibitor OX3050 (28 nM) and rapamycin (20 nM) served as positive controls.

**S5.7** Staining of murine lung with the anti-human CD31 used in Figure 5 and human skin with the anti-mouse CD31 used in S5.4 demonstrate antibody specificity for human or mouse CD31, respectively.

**S5.4, S5.7** Scale bars 100  $\mu$ m.

P values were calculated using one-way ANOVA multiple comparisons test with Dunnett-correction (**S5.1**), one-way ANOVA with Šidák-correction (**S5.2**), one-way ANOVA multiple comparisons test with Tukey-correction (**S5.3, S5.4**). Data show the mean  $\pm$  SD and were collected for 2 implants in each mouse, leading to an observation sample size of n=22 for vehicle (combined), n=8 (1mg/kg/d), n=6 (5 mg/kg/d), n=14 (10 mg/kg/d), and n=8 (15 mg/kg/d).

Statins had no effect on microvascular mural cell (MMC) (**S5.8,9**) and adipogenic (**S5.10,11**) differentiation of HemSC as demonstrated by mRNA levels of MMC genes *Calponin*, *PDGFR-B*, *NG2*, and *TAGLN*. Differentiating cells were treated with 0.1  $\mu$ M Atorvastatin or 0.5  $\mu$ M Simvastatin (n=3 biological replicates). mRNA levels of adipogenic transcription factors *PPAR $\alpha$*  and *cEBP $\alpha$*  as well as *LPL* were measured upon treatment with 0.1  $\mu$ M Atorvastatin, 0.5  $\mu$ M Simvastatin, or 20 nM Rapamycin over the course of an 8-day adipogenic differentiation protocol. Rapamycin served as a positive control. Oil-Red-O staining quantified per total vessel area [%] confirmed statins did not affect adipogenic differentiation (n=4 biological replicates). P values were calculated using one-way ANOVA multiple comparisons test with Šidák-correction; Data show the mean  $\pm$  SD.

**S5.12** compares the reduced vessel density observed at 1 mg/kg/d for simvastatin and atorvastatin (\*) to the calculated human equivalent doses of simvastatin and atorvastatin(1). The red box highlights the human equivalent dose of simvastatin used in infants with Smith-Lemli-Opitz syndrome (0.5-1 mg/kg/d).

#### Reference:

1. Nair AB, and Jacob S. A simple practice guide for dose conversion between animals and human. *J Basic Clin Pharm*. 2016;7(2):27-31.
